# Supplementary material for: Causes and Consequences of Overcrowding in Emergency Departments and Its Impact on Patients’ Care at Main Governmental Hospitals in Gaza Strip: A Cross-sectional Study
Source: Research Square preprint supplement (doi:10.21203/rs.3.rs-7786644/v1), 2025-10-22
Supplement: Supplementary file 1 [file f3a4c74118709b37f7a4535c.docx]

**Causes and Consequences of Overcrowding at Emergency Departments and Its Impact on Patients Care at Main Governmental Hospitals in Gaza Strip.**

- **General Information:**

1. **Age (Years) -------**
2. **Please indicate your gender:**

- Male
- Female

1. **How long you have been working in this ED:**

- Less Than 2 Years
- 2 _ 4 Years
- 5 _ 10 Years
- More than 10 years

1. **At which Emergency Department you are Working:**

- Al Shefa Hospital ED.
- Naser Hospital ED.
- European Gaza Hospital ED.
- Indonesian Hospital ED.

1. **What is your position in this ED:**

- A Doctor.
- A Nurse.

1. **Are you working in a Surgical or Medical Emergency Department:**

- Surgical
- Medical
- Both
- **Causes of Overcrowding Inside the Emergency Department.**

1. **Limited Beds in the Emergency Department: (قلّة عدد الأسرّة)**

- Strongly Agree
- Agree
- Not Sure
- Disagree
- Strongly Disagree

1. **Limited Staff Members in the Emergency Department:**

**(قلّة عدد الطاقم الطبي)**

- Strongly Agree
- Agree
- Not Sure
- Disagree
- Strongly Disagree

1. **Limited Support Staff in the Emergency Department:**

**(قلّة عدد المراسلين و عمال النظافة)**

- Strongly Agree
- Agree
- Not Sure
- Disagree
- Strongly Disagree

1. **Limited Space in the Emergency Department:**

**(مساحة الطوارئ غير كافية)**

- Strongly agree
- Agree
- Not Sure
- Disagree
- Strongly Disagree

1. **Ineffective ED triage system:**

**(عدم فعالية نظام التراياج في الطوارئ)**

- Strongly Agree
- Agree
- Not Sure
- Disagree
- Strongly Disagree

1. **Lengthy Bureaucratic Procedures:**

**(متطلبات إدارية مطوّلة مثل قطع التذاكر!)**

- Strongly Agree
- Agree
- Not Sure
- Disagree
- Strongly Disagree

1. **Seen Patients in the ED stay longer than expected:**

**(حالات الطوارئ تستغرق أكثر من الوقت اللازم)**

- Strongly Agree
- Agree
- Not Sure
- Disagree
- Strongly Disagree

1. **Requesting Unnecessary Investigations:**

**(طلب تحاليل زيادة عن الحاجة و لا تساعد في التشخيص)**

- Strongly Agree
- Agree
- Not Sure
- Disagree
- Strongly Disagree

1. **Poor Doctors Call System:**

**(نظام الإتصال بالطيبيب المناوب غير فعال و قديم)**

- Strongly Agree
- Agree
- Not Sure
- Disagree
- Strongly Disagree

1. **Cases Seen in the ED are Complicated or Multi-trauma:**

**(بعض حالات الطوارئ معقدة و تحتاج مشاورات أقسام مختلفة)**

- Strongly Agree
- Agree
- Not Sure
- Disagree
- Strongly Disagree

1. **Patents Seen at the ED are coming for a non-Emergent Complain:**

**(بعض الحالات غير طارئة و يمكن التعامل معها في العيادة)**

- Strongly Agree
- Agree
- Not Sure
- Disagree
- Strongly Disagree

1. **Lack of protocols for common & regular ED Complaints:**

**(عدم وجود بروتوكلات للتعامل مع الحالات الشائعة)**

- Strongly agree
- Agree
- Not Sure
- Disagree
- Strongly disagree

1. **The Presence of Students & Trainees at the ED:**

**(وجود الطلاب و المتدربين!)**

- Strongly Agree
- Agree
- Not Sure
- Disagree
- Strongly Disagree

1. **Lack of Communication and Coordination between Ambulances and the ED:**

**(عدم التنسيق بين الاسعافات و اقسام الطوارئ لاستقبال الحالات)**

- Strongly Agree
- Agree
- Not Sure
- Disagree
- Strongly Disagree

1. **Dysfunctional or dated Architectural Lay-out of the ED:**

**(التصميم الهندسي للقسم قديم و غير فعال)**

- Strongly Agree
- Agree
- Not Sure
- Disagree
- Strongly Disagree

1. **Inadequate care provided form the response teams like Paramedics:**

**(طواقم الاسعاف لا تقدم الخدمة المطلوبة قبل الوصول للمستشفى)**

- Strongly agree
- Agree
- Not Sure
- Disagree
- Strongly disagree

1. **Inadequate ED equipment to use like stretchers:**

**(قلة المعدات الموجودة في قسم الطوارئ)**

- Strongly Agree
- Agree
- Not Sure
- Disagree
- Strongly Disagree

1. **Radiology delays:**

**(تأخر قسم الأشعة في تنفيذ طلبات قسم الطوارئ)**

- Strongly Agree
- Agree
- Not Sure
- Disagree
- Strongly Disagree

1. **Laboratory delays:**

**(تأخرالمختبر في تنفيذ طلبات قسم الطوارئ)**

- Strongly Agree
- Agree
- Not Sure
- Disagree
- Strongly Disagree

1. **Consultation delays:**

**(التأخرفي الإستشارات الطبية من الأقسام الأخرى)**

- Strongly Agree
- Agree
- Not Sure
- Disagree
- Strongly Disagree

1. **Inadequate refreshment facilities (bathrooms, gardens, kitchens, rooms, Etc.) in ED:**

**(عدم وجود مرافق مناسبة للطاقم الطبي كالاستراحات و الحمامات)**

- Strongly Agree
- Agree
- Not Sure
- Disagree
- Strongly Disagree

1. **Inadequate ED Staff Salary:**

**(رواتب الطاقم الطبي غير مناسبة و غير مشجعة)**

- Strongly Agree
- Agree
- Not Sure
- Disagree
- Strongly Disagree

1. **Allowing more than one family companion to enter the ED with patients:**

**(كثرة عدد مرافقي المرضى داخل قسم الطوارئ)**

- Strongly Agree
- Agree
- Not Sure
- Disagree
- Strongly Disagree

1. **Lack of Security:**

**(عدم وجود عناصر الأمن بالقرب من القسم)**

- Strongly Agree
- Agree
- Not Sure
- Disagree
- Strongly Disagree

1. **Limited Staff during Weekends:**

**(قلة عدد الطاقم الطبي في الإجازة الأسبوعية)**

- Strongly Agree
- Agree
- Not Sure
- Disagree
- Strongly Disagree
- **Consequences of Overcrowding on Patients Care inside the Emergency Department.**

1. **Increasing morbidity and mortality:**

**(زيادة شدة الحالات المرضية و زيادة نسبة الوفاة)**

- Strongly agree
- Agree
- Not sure
- Disagree
- Strongly Disagree

1. **Increasing stress and workload among nurses:**

**(زيادة التوتر بين الممرضين أثناء العمل)**

- Strongly agree
- Agree
- Not sure
- Disagree
- Strongly Disagree

1. **Increasing stress and workload among physicians:**

**(زيادة التوتر بين الأطباء أثناء العمل)**

- Strongly agree
- Agree
- Not sure
- Disagree
- Strongly Disagree

1. **Delays in discharge:**

**(تأخر إخراج الحالات من قسم الطوارئ)**

- Strongly agree
- Agree
- Not sure
- Disagree
- Strongly Disagree

1. **Increase disputes and disagreements between different medical specialties:**

**(زيادة الإختلافات بين التخصصات الطبية المختلفة)**

- Strongly agree
- Agree
- Not sure
- Disagree
- Strongly Disagree

1. **Decrease staff job satisfaction:**

**(نقص نسبة رضى العاملين في قسم الطوارئ)**

- Strongly agree
- Agree
- Not sure
- Disagree
- Strongly disagree

1. **Inaccurate or incomplete patient assessment:**

**(تقييم غير مناسب و غير مكتمل للحالات المرضية)**

- Strongly agree
- Agree
- Not sure
- Disagree
- Strongly Disagree

1. **Poor documentation process:**

**(عدم دقة وكفاية التوثيق في قسم الطوارئ )**

- Strongly agree
- Agree
- Not sure
- Disagree
- Strongly disagree

1. **Delay in transferring admitted patients from the ED to appropriate inpatient units:**

**(التأخر في نقل حالات الدخول ألى الأقسام المناسبة)**

- Strongly agree
- Agree
- Not sure
- Disagree
- Strongly disagree

1. **Decrease patient satisfaction:**

**( نقص نسبة رضى المرضى في قسم الطوارئ)**

- Strongly agree
- Agree
- Not sure
- Disagree
- Strongly Disagree

1. **Increase chances of violent confrontation between families and the ED staff:**

**(زيادة احتمال حدوث المشاكل بين الطاقم الطبي و مرافقي المرضى)**

- Strongly agree
- Agree
- Not sure
- Disagree
- Strongly disagree

1. **Poor handover of patients between shifts:**

**(عدم كفاءة تسليم الحالات بين الشفتات)**

- Strongly agree
- Agree
- Not sure
- Disagree
- Strongly disagree

1. **Missing out some patients in urgent need for assessment and intervention:**

**(نسيان بعض الحالات الحرجة التي بحاجة للإستجابة العاجلة)**

- Strongly agree
- Agree
- Not sure
- Disagree
- Strongly disagree

1. **Increase risk of poor patient outcome:**

**(زيادة احتمالية حدوث نتائج سيئة للمرضى)**

- Strongly agree
- Agree
- Not sure
- Disagree
- Strongly disagree

1. **Increase chances of medical errors:**

**(زيادة احتمالية حدوث الأخطاء الطبية)**

- Strongly agree
- Agree
- Not sure
- Disagree
- Strongly disagree

1. **Friction between disciplines and inter professional clashes:**

**(زيادة احتمالية حدوث المشاكل بين الأقسام كالجراحة والباطنة)**

- Strongly agree
- Agree
- Not sure
- Disagree
- Strongly Disagree

1. **Long waiting time in ED:**

**(زيادة وقت انتظار المرضى)**

- Strongly agree
- Agree
- Not sure
- Disagree
- Strongly Disagree

1. **Decreased ability to protect patient privacy and confidentiality:**

**(عدم القدرة على احترام خصوصية المرضى)**

- Strongly agree
- Agree
- Not sure
- Disagree
- Strongly Disagree

1. **Increased harm to hospitals due to financial losses:**

**(زيادة الضغط المالي على المستشفى)**

- Strongly agree
- Agree
- Not sure
- Disagree
- Strongly Disagree

1. **Increased ambulance diversion:**

**(زيادة تحويل الإسعافات الى مستشفيات أقل إزدحاما)**

- Strongly agree
- Agree
- Not sure
- Disagree
- Strongly disagree

1. **This increased length of stay means an increased cost per patient:**

**(زيادة وقت إقامة المريض يعني زيادة تكلفة علاجه)**

- Strongly agree
- Agree
- Not sure
- Disagree
- Strongly Disagree
